# Supplementary material for: Relative Age Effect in the Sport Environment. Role of Physical Fitness and Cognitive Function in Youth Soccer Players
Source: Int J Environ Res Public Health. 2019 Aug 8;16(16):2837. doi: 10.3390/ijerph16162837 (PMC6719027; doi:10.3390/ijerph16162837)
Supplement: Supplementary file 1 [file ijerph-16-02837-s001.pdf]

Supplementary Material. Table S1. Correlations between Age, Anthropometrics, Physical Fitness and Attentional Functions per age group

|                         |                     | Variables                       | Age Group | 1        | 2         | 3         | 4         | 5         | 6         | 7         | 8         | 9         | 10        | 11        | 12       | 13     | 14       | 15     | 16        | 17       | 18      | 19      | 20       | 21        | 22       |
|-------------------------|---------------------|---------------------------------|-----------|----------|-----------|-----------|-----------|-----------|-----------|-----------|-----------|-----------|-----------|-----------|----------|--------|----------|--------|-----------|----------|---------|---------|----------|-----------|----------|
| Age & Anthropometrics   |                     | (1) Chronological Age           | All       | -        | 0.645***  | 0.566***  | -0.628*** | -0.578*** | 0.549***  | 0.028     | -0.363*** | -0.149    | -0.111    | 0.012     | -0.145   | 0.003  | 0.089    | -0.084 | -0.203    | -0.325** | -0.212* | 0.016   | -0.092   | -0.403*** | -0.337** |
|                         |                     |                                 | u10       |          | 0.101     | -0.108    | -0.191    | -0.004    | -0.002    | 0.107     | -0.096    | -0.197    | 0.194     | -0.184    | 0.296    | -0.154 | 0.264    | -0.002 | 0.163     | -0.118   | 0.034   | -0.254  | 0.123    | 0.193     | 0.044    |
|                         |                     |                                 | u12       |          | 0.094     | 0.111     | -0.261    | -0.207    | 0.162     | 0.251     | 0.160     | 0.192     | -0.121    | -0.041    | -0.189   | -0.053 | -0.059   | 0.149  | -0.084    | 0.158    | 0.179   | 0.099   | -0.031   | 0.114     | 0.368*   |
|                         |                     | (2) Height                      | All       | -        | 0.839***  | -0.383*** | -0.408*** | 0.130     | -0.034    | -0.256*   | -0.174    | -0.021    | -0.054    | -0.036    | -0.134   | 0.091  | 0.064    | -0.049 | -0.216*   | -0.285** | 0.027   | -0.092  | -0.338** | -0.250*   |          |
|                         |                     |                                 | u10       |          | 0.669***  | 0.150     | 0.032     | -0.385    | 0.223     | 0.014     | 0.070     | 0.132     | -0.040    | 0.086     | -0.263   | 0.018  | 0.231    | 0.128  | -0.009    | -0.223   | 0.046   | 0.085   | 0.058    | 0.061     |          |
|                         |                     |                                 | u12       |          | 0.787***  | -0.245    | -0.162    | -0.245    | -0.159    | -0.064    | -0.311*   | 0.134     | -0.165    | 0.123     | -0.091   | 0.092  | 0.168    | 0.193  | -0.008    | -0.162   | -0.090  | -0.110  | -0.169   | -0.012    |          |
|                         |                     | (3) Weight                      | All       | -        | -0.217    | -0.270*   | 0.026     | -0.198    | -0.126    | -0.071    | -0.086    | -0.023    | 0.029     | -0.078    | 0.036    | 0.050  | -0.121   | -0.070 | -0.149    | 0.109    | -0.028  | -0.271* | -0.274*  |           |          |
|                         |                     |                                 | u10       |          | 0.350*    | 0.249     | -0.386    | -0.057    | 0.202     | 0.108     | -0.020    | -0.002    | 0.097     | -0.272    | -0.036   | 0.164  | 0.056    | 0.218  | -0.150    | 0.216    | 0.136   | 0.061   | -0.061   |           |          |
|                         |                     |                                 | u12       |          | 0.074     | 0.007     | -0.489**  | -0.307*   | 0.051     | -0.085    | 0.063     | -0.103    | 0.248     | 0.041     | 0.016    | 0.155  | -0.000   | 0.112  | 0.087     | -0.022   | 0.010   | -0.062  | -0.034   |           |          |
| Physical Fitness        |                     | (4) Agility T-test              | All       | -        | 0.765***  | -0.650*** | -0.161    | 0.210     | 0.209     | 0.172     | 0.124     | 0.240*    | -0.185    | 0.020     | 0.108    | 0.177  | 0.167    | 0.206  | -0.001    | 0.133    | 0.289*  | 0.022   |          |           |          |
|                         |                     |                                 | u10       |          | 0.779***  | -0.456*   | -0.223    | -0.047    | 0.142     | 0.116     | 0.127     | 0.238     | -0.280    | 0.188     | 0.081    | 0.105  | -0.070   | 0.035  | 0.038     | 0.027    | 0.011   | -0.363* |          |           |          |
|                         |                     |                                 | u12       |          | 0.514***  | -0.459**  | -0.333*   | 0.117     | 0.337*    | -0.145    | 0.183     | -0.042    | -0.070    | -0.140    | -0.042   | -0.255 | 0.177    | 0.391* | 0.150     | 0.038    | 0.076   | -0.029  |          |           |          |
|                         |                     | (5) 24 m Speed                  | All       | -        | -0.579*** | -0.111    | 0.181     | 0.182     | 0.131     | 0.115     | 0.238*    | -0.044    | -0.082    | 0.208     | 0.119    | 0.156  | 0.194    | -0.022 | 0.086     | 0.390*** | 0.055   |         |          |           |          |
|                         |                     |                                 | u10       |          | -0.256    | -0.180    | 0.070     | 0.239     | -0.024    | 0.103     | 0.051     | -0.240    | 0.160     | 0.162     | -0.025   | 0.026  | 0.106    | 0.137  | -0.046    | 0.090    | -0.375* |         |          |           |          |
|                         |                     |                                 | u12       |          | -0.477**  | -0.195    | -0.083    | 0.093     | 0.031     | 0.217     | 0.293     | 0.144     | -0.268    | 0.147     | -0.128   | 0.003  | 0.171    | -0.027 | -0.027    | 0.272    | -0.036  |         |          |           |          |
|                         |                     | (6) Endurance TTE               | All       | -        | 0.078     | -0.160    | -0.000    | -0.221    | -0.110    | -0.407*** | 0.138     | -0.097    | -0.182    | -0.207    | -0.186   | -0.218 | 0.131    | -0.172 | -0.421*** | -0.233   |         |         |          |           |          |
|                         |                     |                                 | u10       |          | -0.178    | -0.071    | 0.032     | -0.030    | -0.218    | -0.382    | 0.256     | -0.108    | -0.013    | -0.090    | -0.113   | -0.057 | 0.029    | 0.023  | -0.225    | -0.108   |         |         |          |           |          |
|                         |                     |                                 | u12       |          | 0.447**   | -0.013    | 0.113     | -0.102    | -0.019    | -0.252    | -0.056    | 0.005     | -0.143    | 0.060     | -0.128   | -0.184 | 0.085    | -0.104 | -0.270    | -0.006   |         |         |          |           |          |
| Game Intelligence       |                     | (7) Game Intelligence           | All       | -        | -0.174    | -0.229*   | -0.046    | -0.008    | -0.057    | 0.060     | 0.001     | 0.097     | -0.062    | -0.147    | -0.199   | -0.067 | -0.193   | -0.146 | -0.007    |          |         |         |          |           |          |
|                         |                     |                                 | u10       |          | -0.015    | -0.083    | -0.202    | -0.055    | -0.071    | -0.063    | -0.081    | -0.013    | -0.216    | 0.092     | -0.130   | 0.120  | -0.431** | -0.064 | -0.001    |          |         |         |          |           |          |
|                         |                     |                                 | u12       |          | -0.417**  | -0.414**  | 0.177     | 0.041     | -0.053    | 0.175     | 0.077     | 0.217     | 0.140     | -0.479*** | -0.306*  | -0.263 | 0.160    | -0.289 | -0.036    |          |         |         |          |           |          |
| Attentional Functioning |                     | (8) Mean RT ANTI                | All       | -        | 0.428***  | -0.517*** | 0.054     | -0.330**  | 0.020     | -0.345**  | -0.217*   | -0.478*** | 0.919***  | 0.337**   | 0.695*** | 0.016  | 0.325**  | 0.0191 |           |          |         |         |          |           |          |
|                         |                     |                                 | u10       |          | 0.229     | -0.645*** | 0.040     | -0.568*** | 0.060     | -0.336*   | -0.229    | -0.628*** | 0.903***  | 0.227     | 0.790*** | -0.017 | 0.028    | -0.020 |           |          |         |         |          |           |          |
|                         |                     |                                 | u12       |          | 0.687***  | -0.579*** | 0.127     | -0.194    | -0.010    | -0.370*   | -0.352*   | -0.630*** | 0.919***  | 0.343*    | 0.742*** | -0.056 | 0.410**  | 0.178  |           |          |         |         |          |           |          |
|                         |                     | (9) Mean RT SD ANTI             | All       | -        | -0.309**  | 0.230*    | -0.233*   | 0.070     | -0.321**  | 0.143     | -0.396*** | 0.438***  | 0.620***  | 0.480***  | -0.116   | 0.107  | 0.040    |        |           |          |         |         |          |           |          |
|                         |                     |                                 | u10       |          | -0.354*   | 0.234     | -0.322*   | 0.159     | -0.339*   | 0.308*    | -0.449**  | 0.290     | 0.601***  | 0.431**   | -0.257   | -0.182 | -0.164   |        |           |          |         |         |          |           |          |
|                         |                     |                                 | u12       |          | -0.305*   | 0.247     | -0.165    | -0.028    | -0.295*   | -0.131    | -0.447**  | 0.626***  | 0.623***  | 0.577***  | 0.121    | 0.361* | 0.239    |        |           |          |         |         |          |           |          |
|                         |                     | (10) Mean Error Rate ANTI       | All       | -        | 0.047     | 0.575***  | 0.016     | 0.434***  | 0.275*    | 0.866***  | -0.634*** | -0.197    | -0.728*** | 0.510***  | 0.089    | 0.067  |          |        |           |          |         |         |          |           |          |
|                         |                     |                                 | u10       |          | 0.086     | 0.661***  | 0.004     | 0.471**   | 0.226     | 0.903***  | -0.770*** | -0.336*   | -0.748*** | 0.534***  | 0.210    | 0.050  |          |        |           |          |         |         |          |           |          |
|                         |                     |                                 | u12       |          | 0.003     | 0.333*    | 0.042     | 0.451**   | 0.348*    | 0.774***  | -0.651*** | -0.056    | -0.729*** | 0.413**   | -0.291   | -0.076 |          |        |           |          |         |         |          |           |          |
|                         |                     | (11) Alertness Index RT         | All       | -        | 0.079     | 0.081     | 0.075     | 0.195     | -0.029    | -0.057    | 0.159     | 0.043     | 0.170     | 0.119     | 0.093    |        |          |        |           |          |         |         |          |           |          |
|                         |                     |                                 | u10       |          | -0.006    | 0.307*    | 0.006     | 0.289     | 0.006     | -0.104    | 0.179     | 0.022     | 0.257     | 0.166     | 0.082    |        |          |        |           |          |         |         |          |           |          |
|                         |                     |                                 | u12       |          | 0.240     | -0.157    | 0.139     | 0.093     | -0.061    | 0.036     | 0.172     | 0.064     | 0.042     | 0.146     | 0.180    |        |          |        |           |          |         |         |          |           |          |
|                         |                     | (12) Alertness Index Error Rate | All       | -        | -0.155    | 0.177     | 0.236*    | 0.496***  | -0.354*** | -0.117    | -0.517*** | 0.188     | 0.296**   | 0.180     |          |        |          |        |           |          |         |         |          |           |          |
|                         |                     |                                 | u10       |          | -0.263    | 0.348*    | 0.102     | 0.628***  | -0.575*** | -0.319*   | -0.648*** | 0.204     | 0.310*    | 0.113     |          |        |          |        |           |          |         |         |          |           |          |
|                         |                     |                                 | u12       |          | -0.001    | -0.018    | 0.436**   | 0.127     | -0.198    | 0.099     | -0.311*   | 0.089     | 0.144     | 0.139     |          |        |          |        |           |          |         |         |          |           |          |
|                         |                     | (13) Orienting Index RT         | All       | -        | -0.098    | 0.102     | -0.012    | -0.055    | 0.131     | 0.032     | 0.195     | -0.037    | -0.003    |           |          |        |          |        |           |          |         |         |          |           |          |
|                         |                     |                                 | u10       |          | 0.025     | 0.159     | 0.048     | -0.060    | 0.292     | 0.008     | 0.160     | -0.024    | 0.178     |           |          |        |          |        |           |          |         |         |          |           |          |
|                         |                     |                                 | u12       |          | -0.217    | 0.041     | -0.094    | -0.042    | -0.044    | 0.059     | 0.284     | -0.042    | -0.244    |           |          |        |          |        |           |          |         |         |          |           |          |
|                         |                     | (14) Orienting Index Error Rate | All       | -        | 0.162     | 0.432***  | -0.412*** | -0.139    | -0.436*** | 0.356***  | -0.184    | -0.018    |           |           |          |        |          |        |           |          |         |         |          |           |          |
|                         |                     |                                 | u10       |          | 0.170     | 0.446**   | -0.435**  | -0.223    | -0.378*   | 0.476**   | -0.071    | -0.023    |           |           |          |        |          |        |           |          |         |         |          |           |          |
|                         |                     |                                 | u12       |          | 0.171     | 0.509***  | -0.404**  | -0.020    | -0.509*** | 0.227     | -0.287    | 0.047     |           |           |          |        |          |        |           |          |         |         |          |           |          |
|                         |                     | (15) Control Index RT           | All       | -        | 0.225*    | -0.234*   | 0.109     | -0.230*   | 0.043     | -0.000    | 0.129     |           |           |           |          |        |          |        |           |          |         |         |          |           |          |
|                         |                     |                                 | u10       |          | 0.168     | -0.226    | 0.116     | -0.108    | 0.020     | -0.100    | 0.018     |           |           |           |          |        |          |        |           |          |         |         |          |           |          |
|                         |                     |                                 | u12       |          | 0.286     | -0.382**  | 0.044     | -0.386**  | 0.055     | 0.005     | 0.230     |           |           |           |          |        |          |        |           |          |         |         |          |           |          |
|                         |                     | (16) Control Index Error Rate   | All       | -        | -0.581*** | -0.271*   | -0.756*** | 0.340**   | 0.107     | 0.065     |           |           |           |           |          |        |          |        |           |          |         |         |          |           |          |
|                         |                     |                                 | u10       |          | -0.737*** | -0.438**  | -0.763*** | 0.429**   | 0.162     | 0.004     |           |           |           |           |          |        |          |        |           |          |         |         |          |           |          |
|                         |                     |                                 | u12       |          | -0.681*** | -0.182    | -0.796*** | 0.046     | -0.267    | -0.095    |           |           |           |           |          |        |          |        |           |          |         |         |          |           |          |
| ANTI trials             | (17) Mean RT HIT    | All                             | -         | 0.402*** | 0.722***  | -0.180    | 0.320**   | 0.189     |           |           |           |           |           |           |          |        |          |        |           |          |         |         |          |           |          |
|                         |                     | u10                             |           | 0.322*   | 0.799***  | -0.265    | -0.009    | -0.005    |           |           |           |           |           |           |          |        |          |        |           |          |         |         |          |           |          |
|                         |                     | u12                             |           | 0.398**  | 0.764***  | -0.168    | 0.505***  | 0.203     |           |           |           |           |           |           |          |        |          |        |           |          |         |         |          |           |          |
|                         | (18) Mean RT SD HIT | All                             | -         | 0.166    | -0.061    | 0.238*    | 0.204     |           |           |           |           |           |           |           |          |        |          |        |           |          |         |         |          |           |          |
|                         |                     | u10                             |           | 0.212    | -0.156    | 0.047     | 0.064     |           |           |           |           |           |           |           |          |        |          |        |           |          |         |         |          |           |          |
|                         |                     | u12                             |           | 0.140    | 0.037     | 0.281     | 0.224     |           |           |           |           |           |           |           |          |        |          |        |           |          |         |         |          |           |          |
|                         | (19) Hits           | All                             | -         | -0.108   | 0.016     | -0.101    |           |           |           |           |           |           |           |           |          |        |          |        |           |          |         |         |          |           |          |
|                         |                     | u10                             |           | -0.150   | -0.125    | -0.130    |           |           |           |           |           |           |           |           |          |        |          |        |           |          |         |         |          |           |          |
|                         |                     | u12                             |           | -0.020   | 0.245     | -0.031    |           |           |           |           |           |           |           |           |          |        |          |        |           |          |         |         |          |           |          |
|                         | (20) False Alarms   | All                             | -         | 0.071    | 0.121     |           |           |           |           |           |           |           |           |           |          |        |          |        |           |          |         |         |          |           |          |
| u10                     |                     | 0.129                           |           | 0.145    |           |           |           |           |           |           |           |           |           |           |          |        |          |        |           |          |         |         |          |           |          |
| u12                     |                     | -0.183                          |           | -0.069   |           |           |           |           |           |           |           |           |           |           |          |        |          |        |           |          |         |         |          |           |          |
| AV trials               | (21) AV RT          | All                             | -         | 0.613*** |           |           |           |           |           |           |           |           |           |           |          |        |          |        |           |          |         |         |          |           |          |
|                         |                     | u10                             |           | 0.541*** |           |           |           |           |           |           |           |           |           |           |          |        |          |        |           |          |         |         |          |           |          |
|                         |                     | u12                             |           | 0.526*** |           |           |           |           |           |           |           |           |           |           |          |        |          |        |           |          |         |         |          |           |          |
|                         | (22) AV SD          | All                             | -         |          |           |           |           |           |           |           |           |           |           |           |          |        |          |        |           |          |         |         |          |           |          |
| u10                     |                     |                                 |           |          |           |           |           |           |           |           |           |           |           |           |          |        |          |        |           |          |         |         |          |           |          |
| u12                     |                     |                                 |           |          |           |           |           |           |           |           |           |           |           |           |          |        |          |        |           |          |         |         |          |           |          |
